# Supplementary material for: Mettl14-driven senescence-associated secretory phenotype facilitates somatic cell reprogramming
Source: PubMed Central journal article supplement (PMC9391510; doi:10.1016/j.stemcr.2022.06.012), 2022-08-09
Supplement: mmc1.pdf [file mmc1.pdf]

Stem Cell Reports, Volume 17

## Supplemental Information

### ***Mettl14*-driven senescence-associated secretory phenotype facilitates somatic cell reprogramming**

Chenxiang Xi, Jiatong Sun, Xiaocui Xu, You Wu, Xiaochen Kou, Yanhong Zhao, Jiacheng Shen, Yu Dong, Kang Chen, Zhongqu Su, Dan Liu, Wen Ye, Yingdong Liu, Ran Zhang, Yiliang Xu, Hong Wang, Lujiang Hao, Li Wu, and Shaorong Gao

A

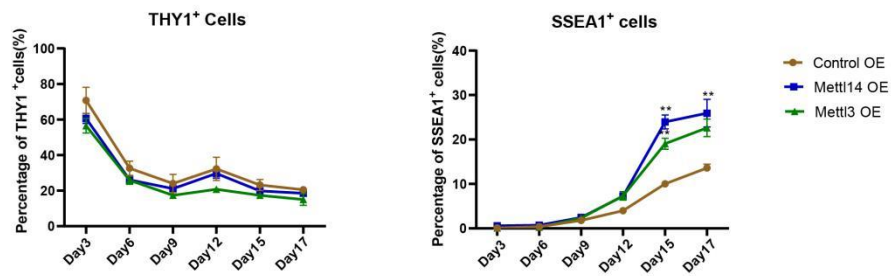

B

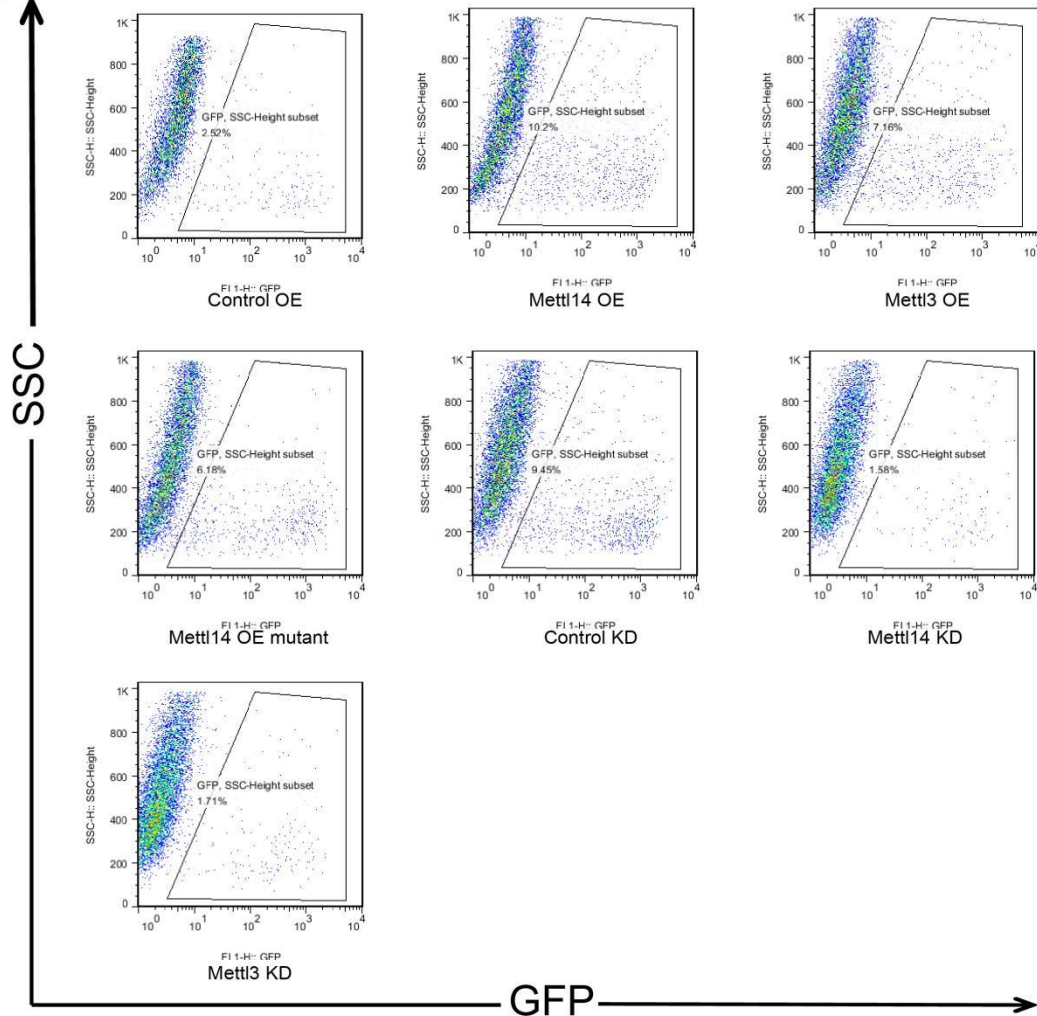

1

2 **Figure S1. *Mettl14* can facilitate reprogramming in an m<sup>6</sup>A-independent manner. Related**  
 3 **to Figure 1.**

4 (A) Kinetic changes of percentage of THY1<sup>+</sup> and SSEA1<sup>+</sup> population at indicated time  
 5 points during reprogramming by FACS analysis. Data are represented as the mean ± SEM (n  
 6 = 3); \* p < 0.05, \*\*p < 0.01 by Student's *t*-test for comparison.

7 (B) FACS analysis showed that the proportion of *Oct4*-GFP<sup>+</sup> cells in each experimental  
 8 group on Day 18 after induction.

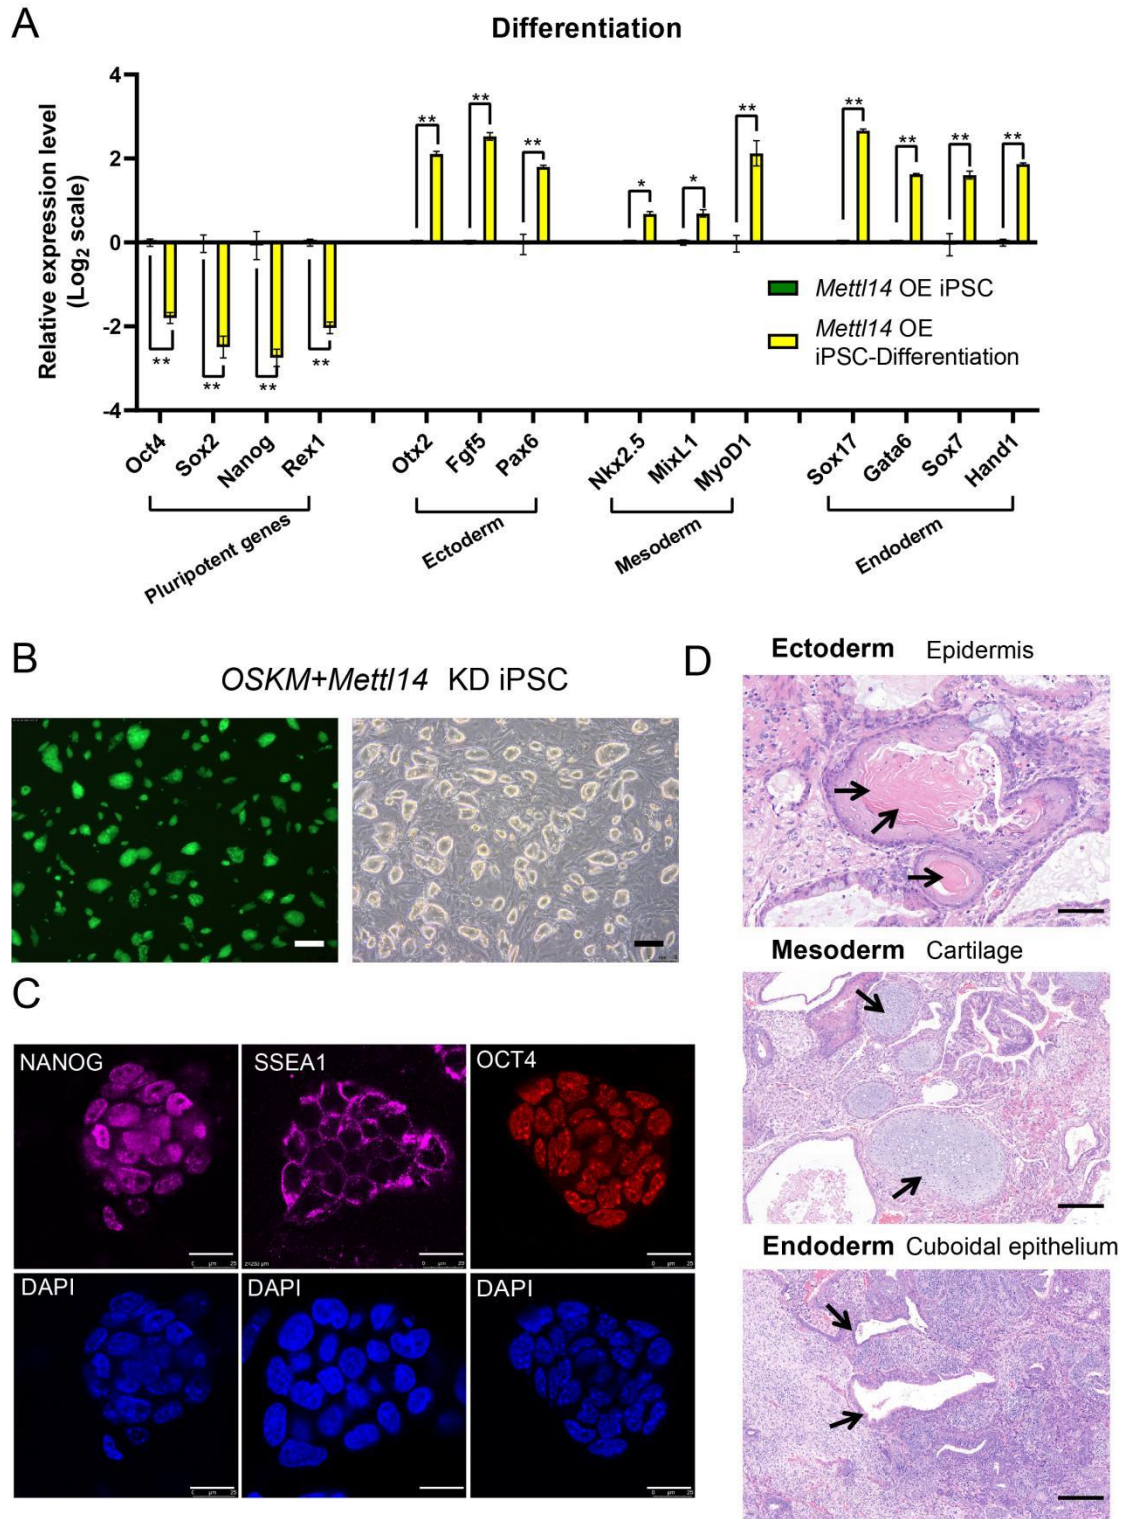

9

10 **Figure S2. iPSC lines with OSKM+Mettl14 OE or KD exhibit pluripotency. Related to**  
 11 **Figure 2.**

12 (A) qRT-PCR analysis shows iPSCs with OSKM+Mettl14 OE line's embryoid bodies can  
 13 subsequently differentiate and express the three embryonic marker genes. Data are  
 14 represented as the mean  $\pm$  SEM (n = 3); \* p < 0.05, \*\*p < 0.01 by Student's *t*-test for  
 15 comparison.

16 (B) Morphology of the iPSCs with OSKM+Mettl14 KD lines. Scale bars, 200  $\mu$ m.

17 (C) Immunostaining analyses for the expression of pluripotent marker genes NANOG  
 18 (purple), SSEA1 (purple) and OCT4 (red), and in the iPSCs with OSKM+*Mettl14* KD lines.  
 19 Nuclear staining by DAPI (blue). Scale bars, 25  $\mu$ m.

20 (D) Haematoxylin and eosin (H&E) staining of teratomas generated by the iPSCs with  
 21 OSKM+*Mettl14* KD. Scale bars, 100  $\mu$ m.

22

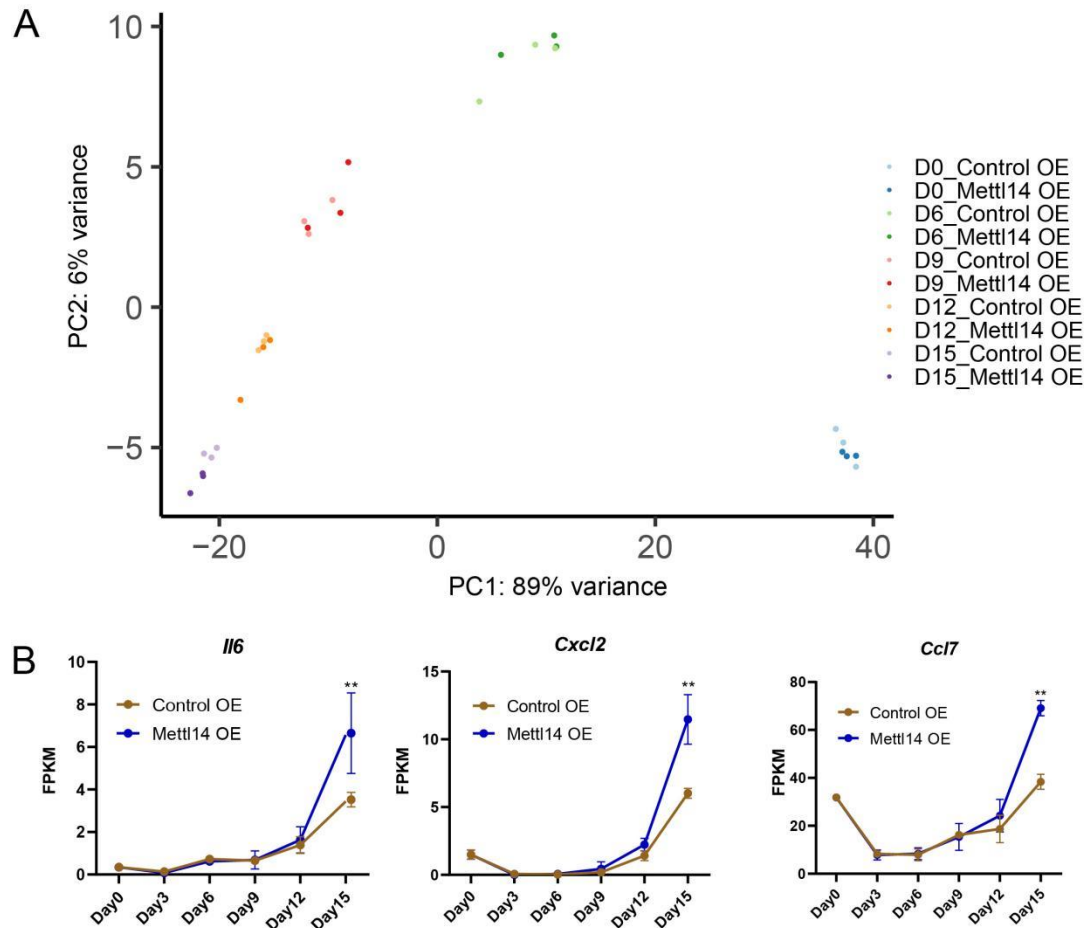

23

24

25 **Figure S3. The expression level of SASP gene was increased after overexpression of**  
 26 ***Mettl14*. Related to Figure 3.**

27 (A) PCA analysis showing changes at various time points during reprogramming.

28 (B) FPKM shows changes in differential genes during reprogramming. Data are  
 29 represented as the mean  $\pm$  SEM (n = 3); \* p < 0.05, \*\*p < 0.01 by Student's *t*-test for  
 30 comparison.

31

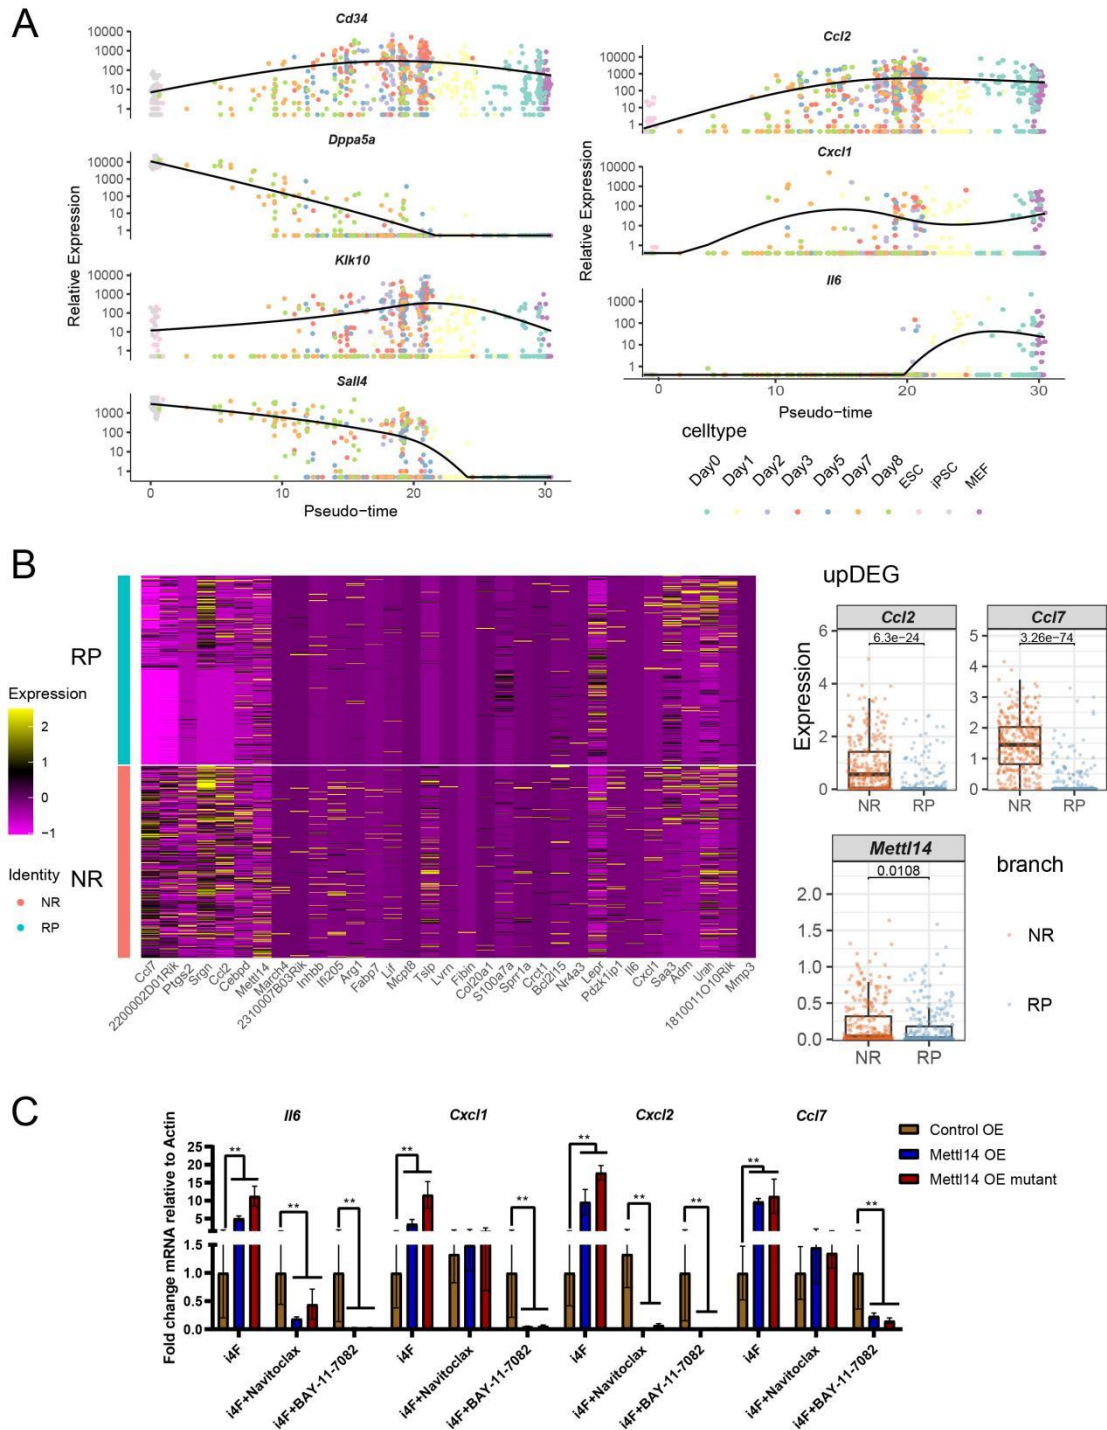

32

33 **Figure S4. Reprogramming efficiency was reduced after treatment of SASP or**  
 34 **senescence inhibitor. Related to Figure 4.**

35 (A) Expression of the non-reprogramming (NR) branch signature genes (*Cd34* and  
 36 *Klf10*) and reprogramming potential (RP) branch signature genes (*Sall4* and *Dppa5a*) along  
 37 the path of the pseudotime.

38 (B) Identification of the differentially expressed genes between NR and RP branches  
 39 using Beta-Poisson model for single-cell RNA-seq data analyses (BPSC) with adjusted  $p <$   
 40 0.05 by Student's *t*-test for comparison..

41 (C) qRT-PCR analysis shows SASP gene expression in the reprogramming system with



42 the addition of inhibitors, shows the proportion of Fold change in these genes compared to  
 43 control, represented relative to expression in  $\beta$ -Actin. Data are represented as the mean  $\pm$   
 44 SEM (n = 3); \* p < 0.05, \*\*p < 0.01 by Student's *t*-test for comparison.

45

46 **Table S1. Primer Sequences Used in this Paper. Related to Figure 2/S2/3/S3/4/S4.**

| Primer Name    | Reverse Primer          | Forward Primer          |
|----------------|-------------------------|-------------------------|
| <i>Oct4</i>    | CGAAGCGACAGATGGTGGTC    | AGAGGATCACCTTGGGGTACA   |
| <i>Sox2</i>    | TGCTTTGTCCGTATCCAGTGC   | AGCAATGGTTCTTATGTTGGACG |
| <i>Nanog</i>   | GCAAGAATAGTTCTCGGGATGAA | CACAGTTTGCCTAGTTCTGAGG  |
| <i>Rex1</i>    | TCTGGGTTGTACGGGTCATAG   | ATGCTACGTTCTACCGGCTTC   |
| <i>Otx2</i>    | GCCCTAGTAAATGTCGTCCTCTC | TATCTAAAGCAACCGCCTTACG  |
| <i>Fgf5</i>    | GAAGAAAACGTCGCGCTACT    | GAAGCGTCTCACTCCCGAAG    |
| <i>Pax6</i>    | GAGTCGCCACTCTTGGCTTA    | GTTGTGTGAGTAAAATTCTGGGC |
| <i>Nkx2-5</i>  | CTGTGCTTGCCTTGTAGC      | GACAAAGCCGAGACGGATGG    |
| <i>MixL1</i>   | TCCCAGGAGTCCAACCTTTGAG  | ACTGAAGCTAGGTGTTTGAAGC  |
| <i>MyoD1</i>   | TCGAAACACGGGTCATCATAGA  | CGGGACATAGACTTGACAGGC   |
| <i>Sox17</i>   | CCACCTCGCCTTTCACCTTTA   | GATGCGGGATACGCCAGTG     |
| <i>Gata6</i>   | GTGGTCGCTTGTGTAGAAGGA   | TTGCTCCGGTAAACAGCAGTG   |
| <i>Sox7</i>    | CGTGTCTGGTACGAGAGA      | ATGCTGGGAAAGTCATGGAAG   |
| <i>Hand1</i>   | GCATCGGGACCATAGGCAG     | GGCAGCTACGCACATCATCA    |
| <i>Cxcl1</i>   | AACCAAGGGAGCTTCAGGGTCA  | TCCAGAGCTTGAAGGTGTTGCC  |
| <i>Cxcl2</i>   | GGCTTCAGGGTCAAGGCAAACCT | CATCCAGAGCTTGAGTGTGACG  |
| <i>Ccl2</i>    | GTCTGGACCCATTCCTTCTTGG  | GCTACAAGAGGATCACCAGCAG  |
| <i>Ccl7</i>    | ATAGCCTCCTCGACCCACTTCT  | CAGAAGGATCACCAGTAGTCGG  |
| <i>Il6</i>     | CTGCAAGTGCATCATCGTTGTTC | TACCACTCACAAGTCGGAGGC   |
| <i>S100a7a</i> | CTGGAGATGGTAGTCCTTACC   | GATAGTGTGCCTCGCTTCATGG  |
| <i>Calca</i>   | CTCAGATCCCACACCGCTTAG   | GCACTGGTGCAGGACTATATGC  |
| <i>Trp53</i>   | GAGGCCGGCTCTGAGTATACC   | GTCCCAGAAGGTTCCCACTGGA  |
| <i>Cdkn1a</i>  | CCAATCTGCGCTTGGAGTGATAG | TCGCTGTCTTGCCTCTGGTGT   |
| <i>Cdkn2a</i>  | CGAATCTGCACCGTAGTTGAGC  | TGTTGAGGCTAGAGAGGATCTTG |
| <i>Rela</i>    | GGTCTCATAGGTCTTTTTCGCGC | TCCTGTTCGAGTCTCCATGCAG  |
| <i>Mettl3</i>  | TGAGAGGTGGTGTAGCAACTT   | CTGGGCACTTGGATTTAAGGAA  |
| <i>Mettl14</i> | AGGTCCAATCCTTCCCAGAA    | GACTGGCATCACTGCGAATGA   |

47

48 **Table S2. FPKM of genes in volcano and heat maps after overexpression of *Mettl14* on Day 15**  
 49 **of reprogramming in RNA-seq Data.**

| Gene Name    | Day15 Control-1 | Day15 Control-2 | Day15 Control-3 | Day15 Mettl14OE-1 | Day15 Mettl14OE-2 | Day15 Mettl14OE-3 |
|--------------|-----------------|-----------------|-----------------|-------------------|-------------------|-------------------|
| <i>Il6</i>   | 3.10071         | 3.42969         | 3.7825          | 4.64235           | 8.43489           | 6.61467           |
| <i>Cilp</i>  | 1.0128          | 1.50932         | 1.58887         | 3.11203           | 2.65677           | 2.40388           |
| <i>Saa3</i>  | 8.63937         | 9.56221         | 13.9514         | 20.1873           | 29.933            | 11.9028           |
| <i>Cxcl2</i> | 6.42135         | 5.6963          | 5.94721         | 9.44787           | 12.9886           | 11.9734           |
| <i>Nr4a3</i> | 1.14686         | 1.78633         | 2.09913         | 4.05531           | 3.63952           | 3.6047            |
| <i>Ccl7</i>  | 38.0989         | 41.6011         | 35.4044         | 72.7539           | 67.5895           | 66.9442           |

|                  |          |          |          |          |          |          |
|------------------|----------|----------|----------|----------|----------|----------|
| <i>Lvrn</i>      | 1.87122  | 2.45833  | 2.0439   | 3.84444  | 4.35767  | 3.27718  |
| <i>Srgn</i>      | 73.2929  | 79.4373  | 48.5089  | 118.761  | 110.202  | 109.196  |
| <i>Ccl2</i>      | 100.858  | 87.6044  | 86.9499  | 151.945  | 162.251  | 144.982  |
| <i>Col20a1</i>   | 0.253553 | 0.424448 | 0.357017 | 0.549747 | 0.676647 | 0.550783 |
| <i>Fibin</i>     | 2.09973  | 2.48539  | 3.49579  | 4.0921   | 4.15271  | 4.8317   |
| <i>Pdzk1ip1</i>  | 11.6125  | 13.1095  | 8.74607  | 21.689   | 15.8428  | 16.597   |
| <i>SI00a7a</i>   | 4.316    | 3.54186  | 4.98286  | 8.49985  | 7.75266  | 7.92842  |
| <i>Ifi205</i>    | 6.91898  | 7.39863  | 7.36023  | 10.825   | 12.0357  | 12.1769  |
| <i>Cxcl1</i>     | 61.6357  | 59.0066  | 56.2672  | 97.6691  | 85.0323  | 99.7257  |
| <i>Lif</i>       | 2.82955  | 2.55727  | 2.63662  | 3.25625  | 4.94839  | 4.42052  |
| <i>Crct1</i>     | 17.9904  | 25.0129  | 15.2178  | 37.5422  | 29.7866  | 25.2319  |
| <i>F5</i>        | 1.02493  | 1.19734  | 1.28256  | 2.24806  | 1.73628  | 1.55523  |
| <i>Fabp7</i>     | 14.4991  | 12.3987  | 12.6412  | 18.2676  | 23.5247  | 19.2173  |
| <i>Lepr</i>      | 0.941787 | 1.07526  | 1.106    | 1.13498  | 2.0702   | 2.02172  |
| <i>I810011O1</i> | 18.4608  | 20.5147  | 19.0956  | 31.4921  | 33.2224  | 25.2479  |
| <i>Inhbb</i>     | 27.8833  | 28.4317  | 31.4826  | 47.3002  | 47.7918  | 38.4     |
| <i>Mcpt8</i>     | 14.1991  | 10.7608  | 13.802   | 22.6779  | 18.5148  | 15.1304  |
| <i>Bcl2l15</i>   | 6.09294  | 6.00122  | 5.60685  | 9.11008  | 8.56783  | 8.19252  |
| <i>Ptgs2</i>     | 29.4949  | 30.585   | 35.2759  | 45.921   | 47.9811  | 45.6273  |
| <i>Tslp</i>      | 6.88578  | 5.68467  | 9.0653   | 9.44746  | 11.7001  | 10.5428  |
| <i>2310007B0</i> | 3.68851  | 2.74692  | 2.72075  | 4.07112  | 4.78983  | 4.83833  |
| <i>Sprr1a</i>    | 101.242  | 96.635   | 104.68   | 160.959  | 151.63   | 129.267  |
| <i>Arg1</i>      | 16.4418  | 19.2019  | 17.5435  | 26.9708  | 27.3734  | 24.8046  |
| <i>Mmp3</i>      | 135.827  | 97.636   | 134.692  | 189.83   | 211.784  | 138.147  |
| <i>Adm</i>       | 11.7006  | 11.0716  | 14.7973  | 21.057   | 17.6963  | 15.5685  |
| <i>Ces2f</i>     | 11.1061  | 12.7747  | 9.26462  | 16.4765  | 17.8925  | 13.4787  |
| <i>Urah</i>      | 21.6548  | 22.2704  | 24.2253  | 31.4051  | 33.0631  | 33.3812  |
| <i>2200002D0</i> | 88.0926  | 89.1785  | 70.3239  | 126.75   | 106.258  | 132.082  |
| <i>Cebpd</i>     | 20.8436  | 22.8618  | 24.0382  | 33.7725  | 32.3735  | 31.3504  |

50

## 51 SUPPLEMENTAL EXPERIMENTAL PROCEDURES

### 52 Mice

53 *Oct4*-GFP<sup>+</sup> (OG2) mice (Jackson laboratory code 004654) were crossed with R26rtTA;  
54 *Col1a1*-4F2A mice (Jackson laboratory code 011004) to obtain Rosa26-M2rtTA; *Col1a1*-4F2A;  
55 *Oct4*-GFP mice. The pathogen-free mice were housed in SPF-level mouse houses at Tongji  
56 University. All of our animal research methods were in accordance with Tongji University  
57 guidelines for the use of laboratory animals.

58

### 59 Cell culture for MEFs, feeders and iPSCs

60 Mouse embryonic fibroblasts (MEFs) for iPSC induction were derived from 12.5-13.5 days  
61 embryos (Embryos were derived from the above transgenic mice), and MEFs were cultured in  
62 Dulbecco's Modified Eagle Medium (DMEM) (Gibco C11960500BT) supplemented with 1 mM  
63 L-glutamine (EmbryoMax TMS-002-C), and 10% (vol/vol) fetal bovine serum (FBS) (Gibco  
64 10270-106). Feeder was obtained by treating the obtained MEFs with mitomycin C for three  
65 hours to render them incompetent for proliferation. iPSCs was cultured on feeder in embryonic  
66 stem cell medium (ESM), a medium of DMEM containing 1% nonessential amino acid (NEAA),  
67 stock (Merck Millipore TMS-001-C), 1 mM L-glutamine (Merck Millipore TMS-002-C), 15% (v/v)

68 FBS (Gibco 16000-44), 0.1 mM  $\beta$ -mercaptoethanol (Merck Millipore ES-007-E) and 1000 U/ml  
69 leukaemia inhibitory factor (LIF) (Merck Millipore ESGRO 1107).

70

#### 71 **iPSCs derivation**

72 The HEK293T cells were transfected with overexpression or knockout plasmids, lentivirus  
73 packaging plasmid psPAX2 and pMD2G using VigoFect transfection reagent (Vigorous  
74 Biotechnology), and replaced fresh ESM 10 hours after transfection. After 48 hours of  
75 transfection, the virus-containing supernatant was collected and filtered using a 0.45  $\mu$ m filter  
76 (Millex SLHV033RB). For overexpression, the starting MEFs were seeded in 12-well plates at  
77 a density of  $0.6-0.8 \times 10^4$  cells/well, and for knockdown, the starting MEFs at a density of  
78  $1.2-1.3 \times 10^4$  cells/well. Cells were then infected with collected virus-containing cultures for 8-12  
79 hours. Infected MEFs were cultured in ESM supplemented with 1  $\mu$ g/mL Dox for 16-18 days.  
80 After clonal morphology formation, culture was continued in ESM without Dox for 2-3 days and  
81 individual clonal colonies were picked to establish iPS cell lines.

82 The iPS colonies will appear after two weeks of Dox treatment, and counted under the  
83 microscope at the indicated time points. The number of *Oct4*-GFP<sup>+</sup> colonies was shown as the  
84 number in each well in a 12-well plate.

85

#### 86 **Flow cytometry analysis**

87 Induced cells at indicated time points were washed once with DPBS, digested with trypsin  
88 and EDTA (TE) solution and neutralized with serum-containing medium. The cells were  
89 centrifuged and resuspended with FACS buffer (PBS+0.1% BSA) and filtered for FACS assay.  
90 If antibody incubation is required, the cells were resuspended at appropriate density with  
91 FACS buffer. The antibodies were added according to the antibody instruction, and incubate  
92 for 30 minutes on ice protecting from light. The cells then washed using FACS buffer once and  
93 filtered. Flow analysis instrument used in this experiment was provided by FACS Calibur (BD,  
94 CA 95131), and the sorting flow analyzer was provided by FACS Aria II (BD).

95

#### 96 **Cell growth curve**

97 MEFs were seeded in 12-well plates and changed fresh ESM with Dox every other day.  
98 The cells were harvested every three days until the end of reprogramming induction by  
99 withdrawal of Dox. Three replicates were containing for each sample at each time point. The  
100 cells were counted by hemocytometer.

101

#### 102 **RNA isolate and real time PCR**

103 The cell samples were lysed with RNAiso Plus. Total RNA was extracted with TRNzol  
104 Universal Reagent (Tiangen), reverse transcribed to cDNA using 5x All-In-One TE MasterMix  
105 (Abm Cat. G490), and reverse transcribed using Eppendorf AG (223331). qRT-PCR was  
106 performed in three replicates per sample, using the  $\Delta$ CT or  $\Delta\Delta$ CT method to normalize the  
107 data, and the internal reference was  *$\beta$ -actin*.

108

#### 109 **Alkaline phosphatase (AP) staining**

110 At the end of reprogramming, the cells in the 12-well plate were washed once with DPBS,  
111 then fixed in 10% formaldehyde for 5 minutes at room temperature, and washed three times



112 with DPBS. The fixed cells were stained using the Beyotime BCIP/NBT alkaline Phosphatase  
113 Color Development Kit (Cat. No. C3206). The staining solution is incubated for 30 minutes at  
114 room temperature and protected from light, and the staining is stopped by washing twice with  
115 DPBS.

116

### 117 **Senescence $\beta$ -Galactosidase ( $\beta$ -Gal) Staining**

118 The cells in the cell culture plate were washed once with DPBS. The Senescence  
119  $\beta$ -Galactosidase Staining Kit (Beyotime Cat.No.C0602) was used for staining. Briefly, the cells  
120 were fixed by  $\beta$ -galactosidase staining fixative at room temperature for 15 minutes. Then the  
121 cell fixative was aspirated and was washed with PBS 3 times and stained with staining working  
122 solution at 37 °C overnight. The stain was removed at the end of staining, and the cells were  
123 washed once with DPBS to abort the staining, and store at 4 °C. Taking photos of stained cells  
124 using Microsystems CMS GmbH (Leica, D-35578 Wetzlar)

125

### 126 **Immunofluorescence (IF) staining**

127 The iPSCs was planted in a 12-well plate with slides, and the colonies were obtained at an  
128 appropriate size. The cells were fixed using 4% paraformaldehyde (PFA) for 1 hour at room  
129 temperature, rinsed in PBS and permeabilized with 0.3% Triton X-100 in DPBS for 15 minutes  
130 at room temperature. The cells were washed with DPBS and blocked with blocking solution  
131 (2.5% BSA in DPBS) at room temperature for 1 hour. The samples were incubated with  
132 primary antibody OCT4 (1:1000, Santa Cruz, SC-5279), NANOG (1:1000, Cosmo Bio,  
133 RCAB001P) diluted in blocking solution incubate for 2 hours at room temperature, then  
134 washed three times with DPBS, and incubated secondary antibody Alexa Fluor 594 donkey  
135 anti-mouse IgG (Thermo Fisher, A21203), or Alexa Fluor 594 donkey anti-rabbit IgG (Thermo  
136 Fisher, A21207). DAPI (1  $\mu$ g/mL, Merck Millipore) diluted in DPBS was used to labeled DNA  
137 for 5-10 min at room temperature. The samples were imaged using Leica Microsystems (Type:  
138 TCS SP8) confocal microscope.

139

### 140 **Embryoid body (EB) differentiation**

141 The iPSCs were trypsinized and plated onto tissue culture plates for 30 minutes to deplete  
142 feeder cells. The supernatant cells were collected and incubated for two days with  $5 \times 10^4$  cell  
143 suspensions per drop and transferred to ultra-low cluster plates (Costar). The cells were  
144 cultured in ESM without LIF. EBs was collected after 5-10 days and seeded in gelatin-coated  
145 tissue culture dishes for 14 days. Total RNA of the cells was then extracted and the analyzed  
146 of marker genes in the three germ layers was detected by qRT-PCR.

147

### 148 **Teratoma formation**

149 The iPSCs were trypsinized and resuspended with DPBS at  $2-3 \times 10^6$  and injected  
150 subcutaneously in the groin of SCID mice. Three to four weeks later, tumor-like growths were  
151 seen at the injection site. Mice were dislocated and executed at the neck. The teratomas were  
152 stripped, placed in 10% formaldehyde solution, fixed overnight at room temperature, stained  
153 for hematoxylin-eosin staining, and the sections were observed under a microscope and  
154 identify the iconic tissue structures of the skin epithelium (ectoderm), cartilage (mesoderm)  
155 and cuboidal epithelium (endoderm), and take photos to record.

156

## 157 **RNA-sequencing and data processing**

158 Collect RNA samples during reprogramming different time points, three biological  
159 replicates for each sample. Total RNA was isolated using QIAGEN RNasy Kit (14104,  
160 Germantown, US). The RNA sequencing libraries were generated using a KAPA Stranded  
161 RNA-Seq Kit Illumina platform (KK8440, Wilmington, US). Paired- end 150-bp sequencing was  
162 further performed on a HiSeq 2500 (Illumina) at Berry Genomics Corporation.

163 RNA-seq data were first subjected to Trim\_galore (version 0.6.4) for adaptor trimming as  
164 well as quality control with the parameters --paired -j 7 --basename. The trimmed paired-end  
165 reads were then aligned to mm9 reference genome with random chromosome cleaned by  
166 STAR (version 2.7.3a) under the parameters --runThreadN 30 --runMode alignReads  
167 --outSAMtype BAM SortedByCoordinate --outSAMstrandField intronMotif. The expression of  
168 genes was quantified as FPKM by Cufflinks (version 2.2.1). For the downstream data analyses,  
169 FPKM values were averaged for each gene between replicates. The RefSeq gene annotation  
170 files were downloaded from UCSC. For genes with multiple isoforms, the longest transcripts  
171 were selected. The R package DESeq2 (version 1.26.0) were used for gene differential  
172 expression analysis. Fold change > 1.5 and FDR < 0.05 were used as cutoff for  
173 down-regulated and up-regulated genes. To perform PCA analysis, read counts per gene were  
174 summarized by the featureCounts function from Subread package. Then the raw counts were  
175 subjected to Variance Stabilizing Transformation by vst function from DESeq2 package, and  
176 then PCA values were calculated by plotPCA function from DESeq2 package.

177 Gene Ontology (GO) enrichment was analyzed by Gene Ontology biological process  
178 (GO\_BP) and Kyoto Encyclopedia of Genes and Genomes (KEGG) in the Database for  
179 Visualization, Annotation and Integrated Discovery (DAVID) web- accessible tool. Gene  
180 ontology terms for each function cluster were summarized to a representative term, and p-  
181 values were plotted to show the significance.

182

## 183 **ELISA**

184 The kit used for the experiment was ABclonal ELISA Kits (Cat.No:RK00038), Specific  
185 experimental procedures refer to the instructions.

186

## 187 **IL6 cytokines**

188 Add 0.05ng/ml Recombinant Murine IL6 (PEPROTECH, Catalog #216-16) to the cells at  
189 different periods of the reprogramming process to explore the effect of IL6 on the  
190 reprogramming process, and count the reprogramming efficiency of each experimental group  
191 after completing the induction.

192

## 193 **Conditional medium induce**

194 The conditional medium of each experimental group during reprogramming was collected.  
195 The collected medium was added to the untransfected reprogrammable MEF cells (The  
196 induction time of transfected reprogrammable MEF cells(conditional medium-providing group)  
197 was two days earlier than that of non-transfected reprogrammable MEF cells, and 1 µg/mL  
198 Dox supplementation to non-transfected MEF cells was required after the addition of cell  
199 conditional medium), and the cells were cultured until the conditional medium-providing group

200 completed the reprogramming induction process, and the untransfected reprogrammable MEF  
201 cells were assayed for reprogramming efficiency.

202

### 203 **Western blot analysis**

204 Cells were washed once with DPBS, digested with trypsin and EDTA (TE) solution, lysed  
205 with a cell lysis solution containing 20 mM Tris (pH 7.5), 150 mM NaCl, 1% Triton X-100, and  
206 various protein inhibitors such as sodium pyrophosphate,  $\beta$ -glycerophosphate, EDTA,  
207 leupeptin solution. Cells were lysed by adding 1 mL of lysis buffer per  $10^7$  cells on ice for half  
208 an hour and then ultrasonicated. Protein concentration was determined with Enhances BCA  
209 Protein Assay Kit (Beyotime, Cat No.P0010). The samples were boiled to 100 °C for 10-15  
210 minutes in loading buffer (EpiZyme, LT101S) with 2%  $\beta$ -mercaptoethanol (Amersham, CT).  
211 Western blot experiment (Protein electrophoresis, protein transfer, antibody containment) was  
212 performed according to Abcam Western blot protocol. Primary antibody use: anti-METTL14  
213 (Sigma, Cat. No. HPA038002; 2  $\mu$ g for immunoprecipitation, 1:1,000 for western blots),  
214 anti-NF- $\kappa$ B P65 (Cell Signaling, Cat. No. 8242; 1:1,000 for western blots), anti-P16 (Santa  
215 Cruz Biotechnology, Cat. No. sc-56330; 1:1,000 for western blots), anti-P21 (Abcam, Cat. No.  
216 7960; 1:1,000 for western blots), anti- $\beta$ -Actin (Merck, Cat. No. A1978, 1:1,000 for western  
217 blots). The secondary antibody used for Western blot were ECL peroxidase-labelled sheep  
218 anti-mouse antibody (GE Healthcare, NA931V) or HRP-labelled goat anti-rabbit antibody  
219 (Beyotime, A0208).

220

### 221 **Single cell RNA-seq data analysis**

222 Raw read counts of single cell RNA-seq data for samples of iPSC generation process  
223 were downloaded from GSE103221 (Guo et al., 2019). The raw read counts were then  
224 converted to HDF5 format by the count-to-h5 function from MAESTRO package (version 1.3.1).  
225 The expression matrices were then loaded into R (version 4.0.5) with Seurat (version 4.0.3).  
226 The Seurat object was then subjected to pseudotime analysis by Monocle (v.2.18.0). The gene  
227 pseudotime plots were generated by plot\_genes\_in\_pseudotime function from Monocle  
228 package, and the heatmaps were generated by DoHeatmap function from Seurat package.

229

### 230 **Statistical Analysis**

231 Results were represented as the mean  $\pm$  SEM of independent experiments. Significance  
232 was determined with Student's *t* tests.

233

234

### 235 **Supplemental reference**

236 Guo, L., Lin, L., Wang, X., Gao, M., Cao, S., Mai, Y., Wu, F., Kuang, J., Liu, H., Yang, J., *et al.* (2019).  
237 Resolving Cell Fate Decisions during Somatic Cell Reprogramming by Single-Cell RNA-Seq. *Mol Cell* 73,  
238 815-829 e817.

239
